# Supplementary material
Source: publisher site journal article supplement (https://www.dovepress.com/article/362401)
Supplement: Supplementary file 1 [file get_supplementary_file.php]

**Supplementary information**

**Supplementary Table 1. Primer sequences for real-time qPCR analysis**

| **Gene name** | **Forward primer (5’-3’)** | **Reverse primer (5’-3’)** |
| --- | --- | --- |
| *Ccl2* | AGCTGTAGTTTTTGTCACCAAGC | GTGCTGAAGACCTTAGGGCA |
| *Ccl3* | ACTGCCTGCTGCTTCTCCTACA | ATGACACCTGGCTGGGAGCAAA |
| *Ccl4* | ACCCTCCCACTTCCTGCTGTTT | CTGTCTGCCTCTTTTGGTCAGG |
| *Cd68* | GGCGGTGGAATACAATGTGTCC | AGCAGGTCAAGGTGAACAGCTG |
| *Fas* | AACCATGCCAACCTGAAAAC | CCGTTTGGCTTCTTTACCCAC |
| *Il1b* | TGCCACCTTTTGACAGTGATG | AAGGTCCACGGGAAAGACAC |
| *Mlkl* | CTGAGGGAACTGCTGGATAGAG | CGAGGAAACTGGAGCTGCTGAT |
| *Ripk1* | GACTGTGTACCCTTACCTCCGA | CACTGCGATCATTCTCGTCCTG |
| *Ripk3* | CCACACCAGCAAGGACATCT | GCCGAACTTGAGGCAGTAGT |
| *Tlr2* | ACAGCAAGGTCTTCCTGGTTCC | GCTCCCTTACAGGCTGAGTTCT |
| *Tlr4* | AGCTTCTCCAATTTTTCAGAACTTC | TGAGAGGTGGTGTAAGCCATGC |
| *Tnf* | ACGTCGTAGCAAACCACCAA | GCAGCCTTGTCCCTTGAAGA |
| *Tspo* | GAGCCTACTTTGTACGTGGCGA | GCTCTTTCCAGACTATGTAGGAG |
| *Zbp1* | CCTGCAATCCCTGAGAACTCC | AGATCTTCCACGTCTGTCCG |
| *18S rRNA* | GAGGTTCGAAGACGATCAGA | TCGCTCCACCAACTAAGAAC |

**Supplementary Figure 1**

**
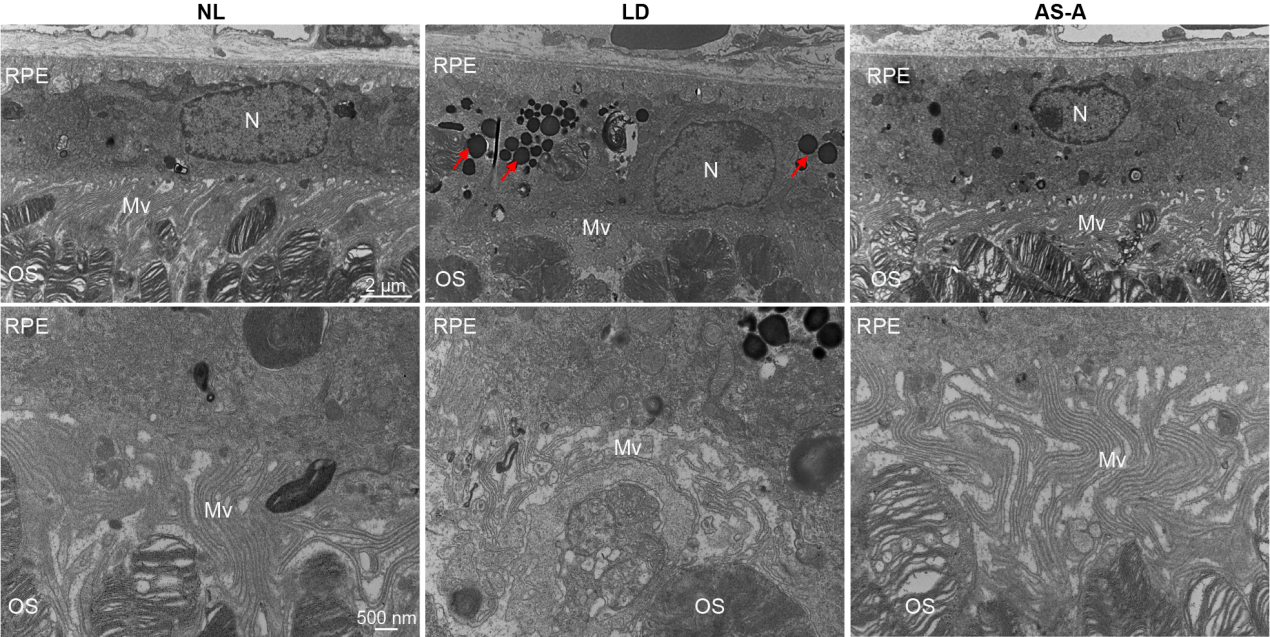
**

**Supplementary Figure 1. AS-A alleviates bright light-induced ultrastructural impairment in the RPE.** Vehicle (LD) or AS-A was administered 30 min prior to exposing the dark-adapted BALB/c mice to white light at 15,000 lux for 30 min. AS-A was administered at 100 mg/kg bw (AS-A). Age- and weight-matched dark-adapted BALB/c mice without bright light exposure received vehicle treatment in the same manner (NL). Eyeballs were enucleated 1 day after the indicated treatments, followed by TEM examination. Mv, microvilli in RPE; N, nucleus; OS, outer segment; RPE, retinal pigment epithelium. Red arrows point to lipofuscin accumulation in RPE.

**Supplementary Figure 2**


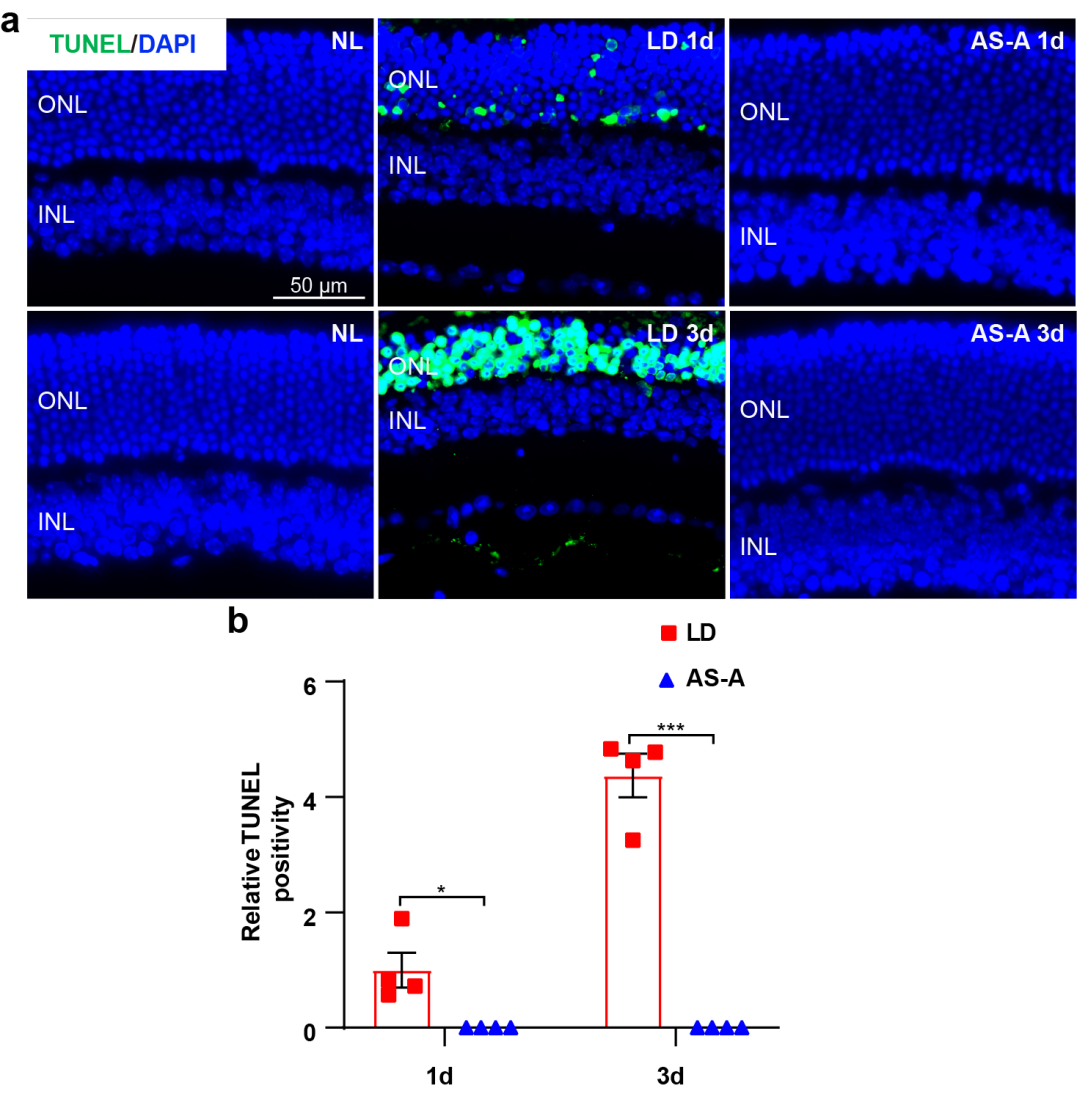


**Supplementary Figure 2. AS-A suppresses bright light-induced photoreceptor cell death.** Vehicle (LD) or AS-A was administered 30 min prior to exposing the dark-adapted BALB/c mice to white light at 15,000 lux for 30 min. AS-A was administered at 100 mg/kg bw (AS-A). Age- and weight-matched dark-adapted BALB/c mice without bright light exposure received vehicle treatment in the same manner (NL). Eyeballs enucleated 1 day (1d) and 3 days (3d) after the indicated treatments were processed to make paraffin sections. (**a**) TUNEL assay was performed to examine cell death (in green) in the retina. DAPI counterstaining (in blue) was performed to visualize the nuclei. (**b**) The TUNEL positivity in the ONL was quantified using Image J and presented as the relative positivity against that from LD. INL, inner nuclear layer; ONL, outer nuclear layer. Data were expressed as mean±S.E.M (n=4 per group). * Compared to that from LD, P<0.05; *** compared to that from LD, P<0.001.

**Supplementary Figure 3**

**
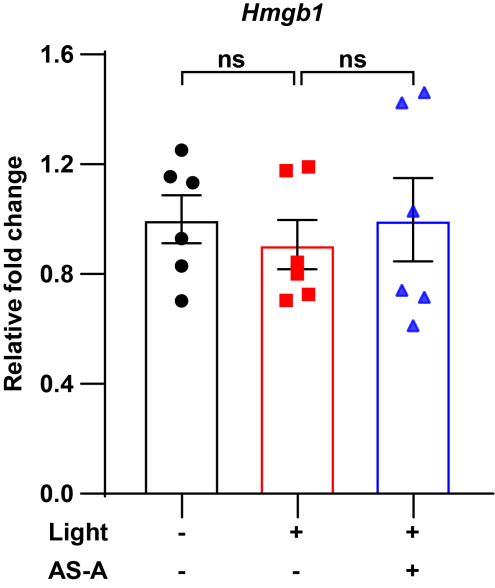
**

**Supplementary Figure 3. The expression of *Hmgb1* is unaltered in the light-exposed retinas.** Total RNA was isolated from the retinas collected from the indicated treatment groups 24 h after experimental light exposure. Real-time qPCR was performed to analyze the expression of *Hmgb1* in the retina. Relative fold change was plotted against that from the mice unexposed to bright light. Data were expressed as mean±S.E.M (n=6 per group). ns, no significant difference.
